# Supplementary material for: Novel Axillary Approach for Brachial Plexus in Robotic Surgery: A Cadaveric Experiment
Source: Minim Invasive Surg. 2014 Jul 21;2014:927456. doi: 10.1155/2014/927456 (PMC4130329; doi:10.1155/2014/927456)
Supplement: Supplementary file 1 — This video show axillary approach to the brachial plexus. da Vinci robot is set through the axillary insicion caudal-cranial direction. Lower part of the plexus C7,C8 and T1 are dissected with specific instruments. Subclavian artery and vein is dissected easily and scalenius anterior muscle is released. [file 927456.f1.zip]

Archive with 1 entries (1 files):
- 927456.f1/mat.927456.v2.wmv
